# Supplementary material for: Rhenium(i) and platinum(ii) complexes with diimine ligands bearing acidic phenol substituents: hydrogen-bonding, acid–base chemistry and optical properties
Source: Royal Society of Chemistry journal article supplement (doi:10.1039/c0dt00393j), 2010-01-01
Supplement: c0dt00393j.pdf [file c0dt00393j.pdf]

## Supporting Information

# Rhenium(I) and Platinum(II) Complexes with Diimine Ligands Bearing Acidic Phenol Substituents: Hydrogen-Bonding, Acid-Base Chemistry and Optical Properties

Wei Liu and Katja Heinze\*

*Johannes Gutenberg-University of Mainz, Duesbergweg 10-14, 55128 Mainz, Germany*

**Table S1.** Geometrical parameters of H...A contacts for **1** and **4**.

| D            | A     | D–H (Å) | H...A (Å) | D–H...A (°) | D...A (Å) | symmetry operation                              |
|--------------|-------|---------|-----------|-------------|-----------|-------------------------------------------------|
| <b>1</b>     |       |         |           |             |           |                                                 |
| O(4)–H(4A)   | Cl(1) | 0.84    | 2.85      | 102         | 3.129(3)  | $\frac{1}{2}-x, -\frac{1}{2}+y, \frac{3}{2}-z$  |
| O(4)–H(4A)   | O(2)  | 0.84    | 2.53      | 142         | 3.240(5)  | $\frac{1}{2}-x, -\frac{1}{2}+y, \frac{3}{2}-z$  |
| C(5)–H(5A)   | O(2)  | 0.95    | 2.47      | 130         | 3.168(5)  | $\frac{1}{2}+x, \frac{1}{2}-y, -\frac{1}{2}+z$  |
| C(9)–H(9A)   | O(3)  | 0.95    | 2.38      | 159         | 3.291(5)  | $-\frac{1}{2}+x, \frac{1}{2}-y, -\frac{1}{2}+z$ |
| <b>4</b>     |       |         |           |             |           |                                                 |
| C(10)–H(10A) | O(3)  | 0.98    | 2.53      | 160         | 3.470(4)  | $2-x, 1-y, 1-z$                                 |
| C(12)–H(12A) | Cl(1) | 0.95    | 2.74      | 161         | 3.646(2)  | $2-x, 2-y, -z$                                  |
| C(18)–H(18A) | O(2)  | 0.95    | 2.54      | 162         | 3.452(3)  | $1+x, y, z$                                     |

**Table S2.** Relevant C–O and C–C bond lengths / Å of the catecholato ligand in **7**.

|          |          |
|----------|----------|
| <b>7</b> |          |
| C1–O1    | 1.359(3) |
| C6–O2    | 1.359(3) |
| C1–C2    | 1.415(3) |
| C2–C3    | 1.396(3) |
| C3–C4    | 1.399(4) |
| C4–C5    | 1.390(3) |
| C5–C6    | 1.415(3) |
| C6–C1    | 1.409(3) |

**Table S3.** Main calculated optical transitions for complexes **1**, **1<sup>-</sup>**, **2**, **3**, **3<sup>-</sup>**, **4**, **6**, **6<sup>-</sup>**, **7** (gas phase, CH<sub>2</sub>Cl<sub>2</sub>, THF, CH<sub>3</sub>CN).

| complex / simulated spectrum <sup>d</sup>                                                                       | Orbital Excitations <sup>b</sup>                                                                                           | Composition     | $\lambda$ / nm | $f$    |
|-----------------------------------------------------------------------------------------------------------------|----------------------------------------------------------------------------------------------------------------------------|-----------------|----------------|--------|
| <b>1</b> ( $f > 0.016$ )<br>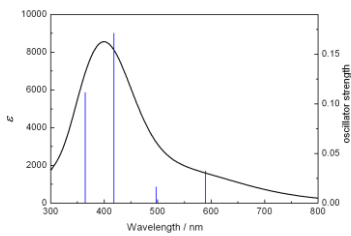   | 84 (H-5)→90 (L)                                                                                                            | 0.52679         | 364            | 0.1115 |
|                                                                                                                 | 85 (H-4)→90 (L)                                                                                                            | -0.11268        |                |        |
|                                                                                                                 | 88 (H-1)→91 (L+1)                                                                                                          | 0.27482         |                |        |
|                                                                                                                 | 89 (H)→91 (L+1)                                                                                                            | 0.28022         |                |        |
|                                                                                                                 | 86 (H-3)→90 (L)                                                                                                            | 0.60113         | 418            | 0.1712 |
|                                                                                                                 | 87 (H-2)→90 (L)                                                                                                            | -0.28949        |                |        |
|                                                                                                                 | 86 (H-3)→90 (L)                                                                                                            | 0.32459         | 497            | 0.0162 |
|                                                                                                                 | 87 (H-2)→90 (L)                                                                                                            | 0.62019         |                |        |
|                                                                                                                 | 88 (H-1)→90 (L)                                                                                                            | 0.67189         | 589            | 0.0323 |
|                                                                                                                 | <b>1<sup>-</sup></b> ( $f > 0.016$ )<br> | 89 (H)→93 (L+3) | 0.69438        | 350    |
| 86 (H-3)→90 (L)                                                                                                 |                                                                                                                            | 0.21825         | 441            | 0.2430 |
| 89 (H)→90 (L)                                                                                                   |                                                                                                                            | 0.18168         |                |        |
| 89 (H)→91 (L+1)                                                                                                 |                                                                                                                            | 0.56897         |                |        |
| 86 (H-3)→90 (L)                                                                                                 |                                                                                                                            | 0.65745         | 465            | 0.0250 |
| 89 (H)→91 (L+1)                                                                                                 |                                                                                                                            | -0.21801        |                |        |
| 87 (H-2)→90 (L)                                                                                                 |                                                                                                                            | 0.64598         | 488            | 0.0578 |
| 89 (H)→90 (L)                                                                                                   |                                                                                                                            | 0.13633         |                |        |
| 89 (H)→91 (L+1)                                                                                                 |                                                                                                                            | -0.20353        |                |        |
| 87 (H-2)→90 (L)                                                                                                 |                                                                                                                            | -0.11816        | 519            | 0.0168 |
| 88 (H-1)→90 (L)                                                                                                 |                                                                                                                            | 0.66230         |                |        |
| 87 (H-2)→90 (L)                                                                                                 |                                                                                                                            | -0.21997        | 539            | 0.3710 |
| 88 (H-1)→90 (L)                                                                                                 |                                                                                                                            | -0.16156        |                |        |
| 89 (H)→90 (L)                                                                                                   | 0.48449                                                                                                                    |                 |                |        |
| 89 (H)→91 (L+1)                                                                                                 | -0.22744                                                                                                                   |                 |                |        |
| <b>2</b> ( $f > 0.016$ )<br> | 104 (H-5)→110 (L)                                                                                                          | 0.54633         | 364            | 0.1079 |
|                                                                                                                 | 108 (H-1)→110 (L)                                                                                                          | 0.26665         |                |        |
|                                                                                                                 | 109 (H)→111 (L+1)                                                                                                          | 0.26355         |                |        |
|                                                                                                                 | 106 (H-3)→110 (L)                                                                                                          | 0.57564         | 427            | 0.2087 |
|                                                                                                                 | 107 (H-2)→110 (L)                                                                                                          | -0.34521        |                |        |
|                                                                                                                 | 106 (H-3)→110 (L)                                                                                                          | 0.38123         | 496            | 0.0273 |
|                                                                                                                 | 107 (H-2)→110 (L)                                                                                                          | 0.58559         |                |        |
|                                                                                                                 | 108 (H-1)→110 (L)                                                                                                          | 0.67141         | 588            | 0.0312 |

$3^-$  ( $f > 0.016$ )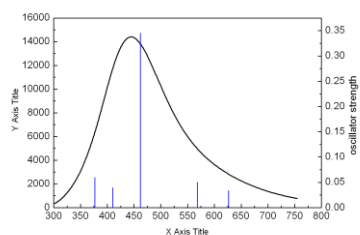

|                  |          |     |        |
|------------------|----------|-----|--------|
| 94 (H-6)→101 (L) | 0.61718  | 377 | 0.0596 |
| 95 (H-5)→101 (L) | -0.13006 |     |        |
| 96 (H-4)→101 (L) | 0.18526  |     |        |
| 94 (H-6)→101 (L) | 0.21390  | 410 | 0.0392 |
| 95 (H-5)→101 (L) | 0.60321  |     |        |
| 96 (H-4)→101 (L) | -0.25050 |     |        |
| 97 (H-3)→101 (L) | 0.55491  | 462 | 0.3450 |
| 98 (H-2)→101 (L) | -0.35869 |     |        |
| 97 (H-3)→101 (L) | 0.40589  | 568 | 0.0502 |
| 98 (H-2)→101 (L) | 0.56199  |     |        |
| 94 (H-6)→101 (L) | 0.11987  | 627 | 0.0338 |
| 99 (H-1)→101 (L) | 0.65491  |     |        |

 $3^-$  ( $f > 0.016$ )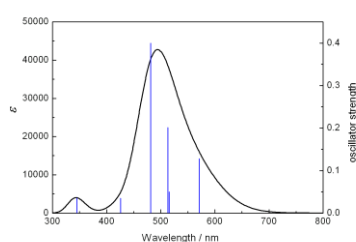

|                  |          |     |        |
|------------------|----------|-----|--------|
| 93 (H-7)→101 (L) | 0.14726  | 345 | 0.0358 |
| 94 (H-6)→101 (L) | 0.63408  |     |        |
| 95 (H-5)→101 (L) | 0.20837  |     |        |
| 95 (H-5)→101 (L) | 0.19357  | 426 | 0.0348 |
| 96 (H-4)→101 (L) | 0.66462  |     |        |
| 96 (H-4)→101 (L) | 0.10670  | 481 | 0.3996 |
| 98 (H-2)→101 (L) | 0.49089  |     |        |
| 99 (H-1)→101 (L) | 0.19725  |     |        |
| 100 (H)→101 (L)  | 0.30573  |     |        |
| 97 (H-3)→101 (L) | 0.24688  | 513 | 0.2014 |
| 98 (H-2)→101 (L) | 0.46215  |     |        |
| 99 (H-1)→101 (L) | -0.29753 |     |        |
| 100 (H)→101 (L)  | -0.26690 |     |        |
| 97 (H-3)→101 (L) | 0.63223  | 515 | 0.0498 |
| 98 (H-2)→101 (L) | -0.10503 |     |        |
| 99 (H-1)→101 (L) | 0.17154  |     |        |
| 100 (H)→101 (L)  | 0.13538  |     |        |
| 99 (H-1)→101 (L) | 0.57573  | 571 | 0.1280 |
| 100 (H)→101 (L)  | -0.32455 |     |        |

 $4^-$  ( $f > 0.016$ )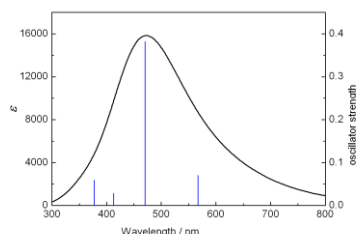

|                   |          |     |        |
|-------------------|----------|-----|--------|
| 102 (H-6)→109 (L) | 0.63184  | 377 | 0.0592 |
| 104 (H-4)→109 (L) | -0.12728 |     |        |
| 105 (H-3)→109 (L) | 0.10127  |     |        |
| 102 (H-6)→109 (L) | 0.14935  | 413 | 0.0284 |
| 103 (H-5)→109 (L) | 0.64435  |     |        |
| 104 (H-4)→109 (L) | 0.16729  |     |        |
| 105 (H-3)→109 (L) | -0.10890 |     |        |
| 104 (H-4)→109 (L) | 0.33836  | 470 | 0.3819 |
| 105 (H-3)→109 (L) | 0.43126  |     |        |
| 106 (H-2)→109 (L) | -0.37846 |     |        |
| 104 (H-4)→109 (L) | 0.29646  | 567 | 0.0699 |
| 105 (H-3)→109 (L) | 0.30475  |     |        |
| 106 (H-2)→109 (L) | 0.54719  |     |        |
| 102 (H-6)→109 (L) | 0.11754  | 625 | 0.0361 |
| 107 (H-1)→109 (L) | 0.65515  |     |        |

|                                                                                                                                      |                                                                                                                                      |                  |          |        |
|--------------------------------------------------------------------------------------------------------------------------------------|--------------------------------------------------------------------------------------------------------------------------------------|------------------|----------|--------|
| <b>6<sup>+</sup> (<math>f &gt; 0.06</math>)</b><br>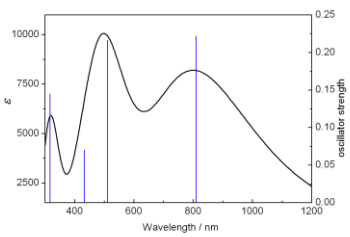 | 132 (H)→137 (L+4)                                                                                                                    | 0.68958          | 317      | 0.1449 |
|                                                                                                                                      | 126 (H-6)→133 (L)                                                                                                                    | -0.11524         | 432      | 0.0702 |
|                                                                                                                                      | 127 (H-5)→133 (L)                                                                                                                    | 0.64908          |          |        |
|                                                                                                                                      | 130 (H-2)→133 (L)                                                                                                                    | -0.17122         |          |        |
|                                                                                                                                      | 126 (H-6)→133 (L)                                                                                                                    | 0.10564          | 511      | 0.2159 |
|                                                                                                                                      | 127 (H-5)→133 (L)                                                                                                                    | 0.16839          |          |        |
|                                                                                                                                      | 128 (H-4)→133 (L)                                                                                                                    | 0.20652          |          |        |
|                                                                                                                                      | 130 (H-2)→133 (L)                                                                                                                    | 0.59525          |          |        |
|                                                                                                                                      | 132 (H)→133 (L)                                                                                                                      | 0.53556          | 809      | 0.2216 |
|                                                                                                                                      | <b>6<sup>-</sup> (<math>f &gt; 0.06</math>)</b><br> | 125 (H-7)→133(L) | -0.14634 | 405    |
| 126 (H-6)→133(L)                                                                                                                     |                                                                                                                                      | 0.19985          |          |        |
| 127 (H-5)→133(L)                                                                                                                     |                                                                                                                                      | 0.53725          |          |        |
| 131 (H-1)→133(L)                                                                                                                     |                                                                                                                                      | -0.13373         |          |        |
| 132 (H)→133(L)                                                                                                                       |                                                                                                                                      | -0.26301         |          |        |
| 127(H-5)→133(L)                                                                                                                      |                                                                                                                                      | 0.16568          | 506      | 0.5048 |
| 130 (H-2)→133(L)                                                                                                                     |                                                                                                                                      | -0.40734         |          |        |
| 131 (H-1)→133(L)                                                                                                                     |                                                                                                                                      | 0.39158          |          |        |
| 131 (H-1)→133(L)                                                                                                                     |                                                                                                                                      | -0.19734         | 859      | 0.1311 |
| 132 (H)→133(L)                                                                                                                       |                                                                                                                                      | 0.59328          |          |        |

|                                                                                                                                                            |                   |          |     |        |
|------------------------------------------------------------------------------------------------------------------------------------------------------------|-------------------|----------|-----|--------|
| <b>7 gas phase (<math>f &gt; 0.06</math>)</b><br>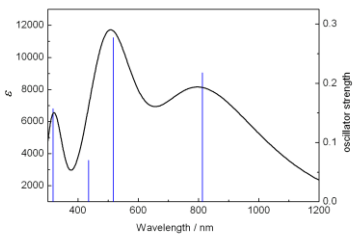                         | 140 (H)→145 (L+4) | 0.69086  | 317 | 0.1573 |
|                                                                                                                                                            | 135 (H-5)→141 (L) | 0.65872  | 435 | 0.0700 |
|                                                                                                                                                            | 138 (H-2)→141 (L) | -0.15645 |     |        |
|                                                                                                                                                            | 135 (H-5)→141 (L) | 0.15214  | 517 | 0.2772 |
|                                                                                                                                                            | 136 (H-4)→141 (L) | 0.12744  |     |        |
|                                                                                                                                                            | 138 (H-2)→141 (L) | 0.62278  |     |        |
|                                                                                                                                                            | 140 (H)→141 (L)   | 0.53761  | 813 | 0.2177 |
| <b>7 in THF (<math>f &gt; 0.06</math>)</b><br>                            | 135 (H-5)→141 (L) | 0.65556  | 434 | 0.0674 |
|                                                                                                                                                            | 137 (H-3)→141 (L) | 0.11778  |     |        |
|                                                                                                                                                            | 138 (H-2)→141 (L) | -0.10609 |     |        |
|                                                                                                                                                            | 139 (H-1)→141 (L) | 0.11514  |     |        |
|                                                                                                                                                            | 134 (H-6)→141 (L) | 0.10381  | 508 | 0.1001 |
|                                                                                                                                                            | 136 (H-4)→141 (L) | 0.60497  |     |        |
|                                                                                                                                                            | 138 (H-2)→141 (L) | -0.30545 |     |        |
|                                                                                                                                                            | 134 (H-6)→141 (L) | 0.10057  | 528 | 0.3094 |
|                                                                                                                                                            | 136 (H-4)→141 (L) | 0.31351  |     |        |
|                                                                                                                                                            | 138 (H-2)→141 (L) | 0.57809  |     |        |
|                                                                                                                                                            | 140 (H)→141 (L)   | 0.57766  | 830 | 0.2465 |
| <b>7 in CH<sub>2</sub>Cl<sub>2</sub> (<math>f &gt; 0.06</math>)</b><br> | 135 (H-5)→141 (L) | 0.65618  | 434 | 0.0673 |
|                                                                                                                                                            | 137 (H-3)→141 (L) | 0.11817  |     |        |
|                                                                                                                                                            | 138 (H-2)→141 (L) | -0.10293 |     |        |
|                                                                                                                                                            | 139 (H-1)→141 (L) | 0.11918  |     |        |
|                                                                                                                                                            | 136 (H-4)→141 (L) | 0.58703  | 509 | 0.1233 |
|                                                                                                                                                            | 138 (H-2)→141 (L) | -0.33723 |     |        |
|                                                                                                                                                            | 134 (H-6)→141 (L) | 0.10371  | 529 | 0.2918 |
|                                                                                                                                                            | 136 (H-4)→141 (L) | 0.34697  |     |        |
|                                                                                                                                                            | 138 (H-2)→141 (L) | 0.56129  |     |        |
|                                                                                                                                                            | 140 (H)→141 (L)   | 0.58041  | 829 | 0.2465 |
| <b>7 in CH<sub>3</sub>CN (<math>f &gt; 0.06</math>)</b><br>             | 135 (H-5)→141 (L) | 0.64991  | 432 | 0.0615 |
|                                                                                                                                                            | 137 (H-3)→141 (L) | 0.14767  |     |        |
|                                                                                                                                                            | 139 (H-1)→141 (L) | -0.12832 |     |        |
|                                                                                                                                                            | 136 (H-4)→141 (L) | 0.54727  | 508 | 0.1684 |
|                                                                                                                                                            | 138 (H-2)→141 (L) | -0.39584 |     |        |
|                                                                                                                                                            | 134 (H-6)→141 (L) | 0.10770  | 529 | 0.2456 |
|                                                                                                                                                            | 136 (H-4)→141 (L) | 0.40883  |     |        |
|                                                                                                                                                            | 138 (H-2)→141 (L) | 0.52336  |     |        |
|                                                                                                                                                            | 140 (H)→141 (L)   | 0.58546  | 815 | 0.2317 |

<sup>a</sup> The simulated UV/Vis spectra were obtained with the GaussSum program V 2.2; N. M. O'Boyle, J. G. Vos, GaussSum; Dublin City University; Dublin, Ireland, 2005; available at <http://gausssum.sourceforge.net>.

<sup>b</sup> The molecular orbital # involved in each transition.

**Fig. S1.** Crystal packing of complex **4** along the *a*-axis (a), *b*-axis (b), and resulting three-dimensional network (c). Hydrogen contacts are indicated by dashed lines.

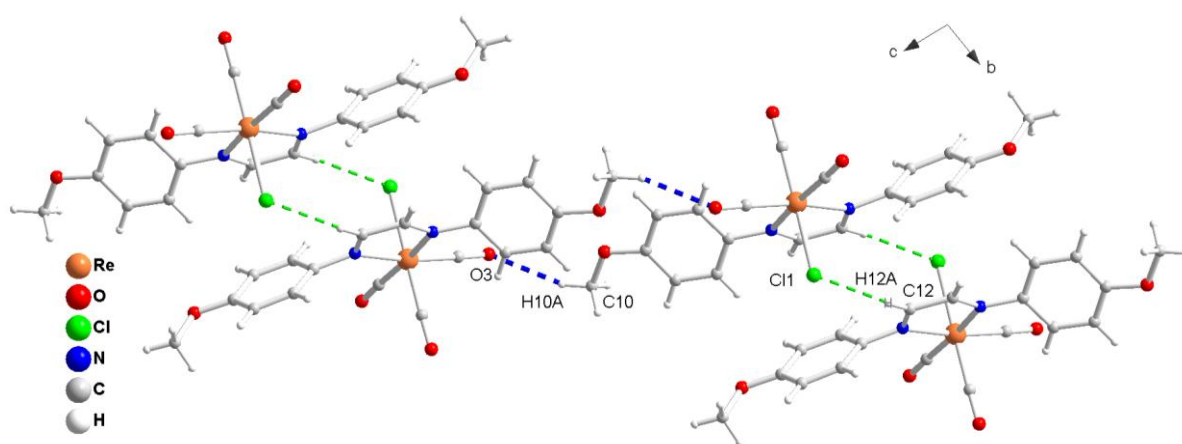

(a)

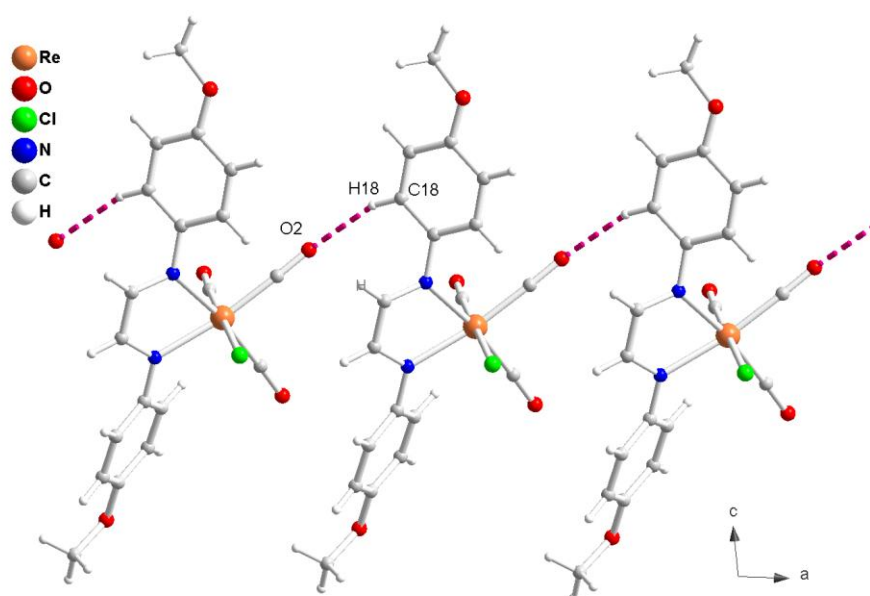

(b)

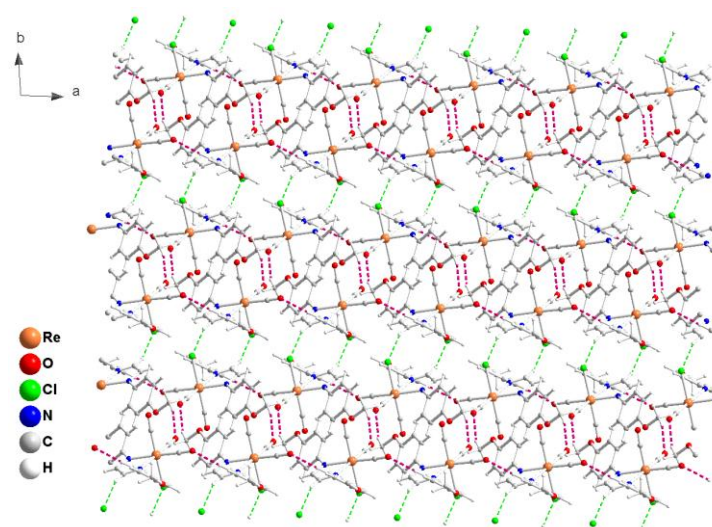

(c)

**Fig. S2.** UV/Vis absorption spectrum of **1** in THF and band deconvolution (linear correlation coefficient  $R^2 = 0.9998$ ), with Gaussian line shapes (328, 370, 424 and 430 nm).

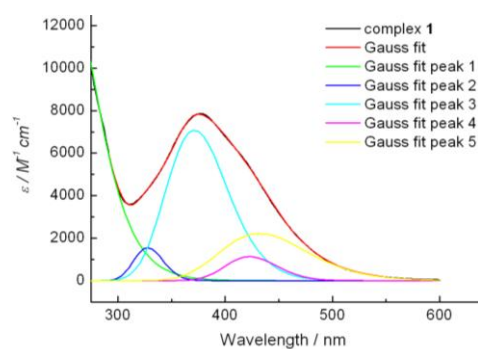

**Fig. S3.** UV/Vis absorption spectrum of **2** in THF and band deconvolution (linear correlation coefficient  $R^2 = 0.9999$ ), with Gaussian line shapes (338, 368 and 412 nm).

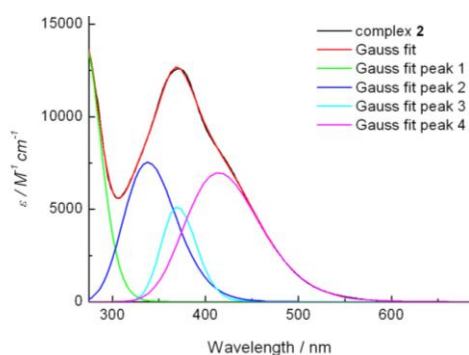

**Fig. S4.** UV/Vis absorption spectrum of **3** in THF and band deconvolution (linear correlation coefficient  $R^2 = 0.9999$ ), with Gaussian line shapes (413, 435 and 448 nm).

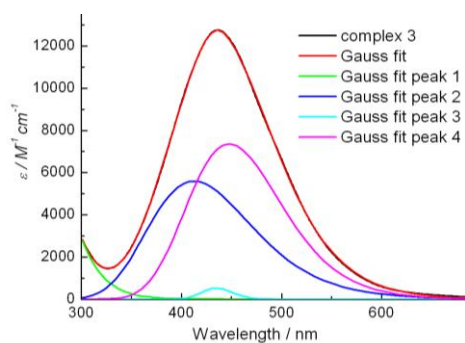

**Fig. S5.** UV/Vis absorption spectrum of **4** in THF and band deconvolution (linear correlation coefficient  $R^2 = 0.9995$ ), with Gaussian line shapes (419, 442 and 461 nm).

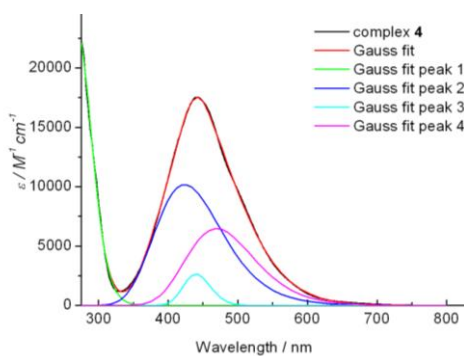

**Fig. S6.** UV/Vis absorption spectra of **6** in THF and band deconvolution (linear correlation coefficient  $R^2 = 0.9999$ ), with Gaussian line shapes (357, 403, 446, 488, 564, 667, 817 and 904 nm) [left] and of **7** in THF and band deconvolution (linear correlation coefficient  $R^2 = 0.9997$ ), with Gaussian line shapes (407, 443, 495, 662, 779, 864 and 949 nm) [right].

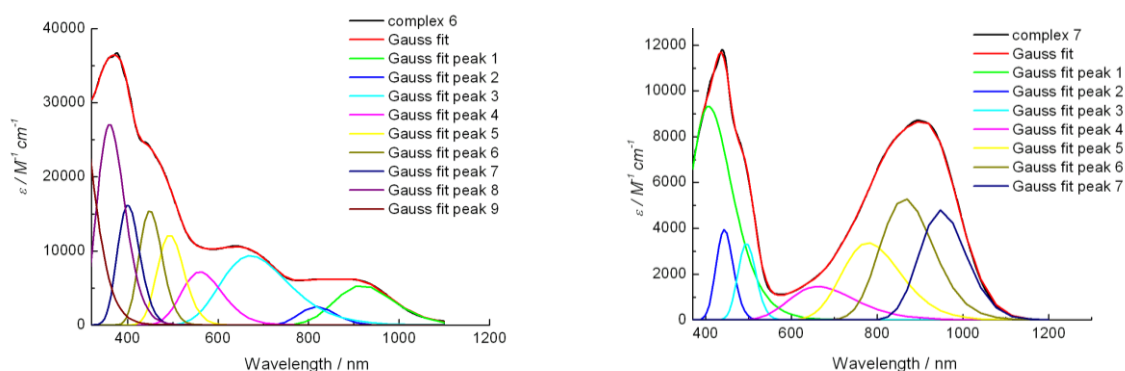

**Fig. S7.** UV/Vis absorption spectra of **1**, after reaction with  $P_1$ -*t*-Bu and upon reacidification with  $CH_3COOH$  ( $4 \times 10^{-5}$  M) in THF.

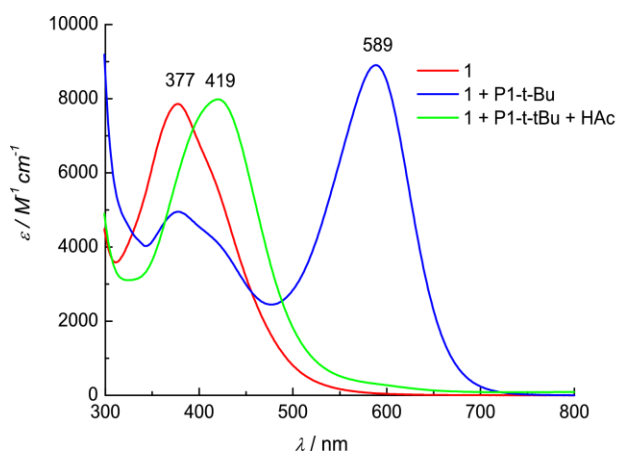

**Fig. S8.** UV/Vis absorption spectra of **3**, after reaction with  $P_1$ -*t*-Bu and upon reacidification with  $CH_3COOH$  ( $4 \times 10^{-5}$  M) in THF.

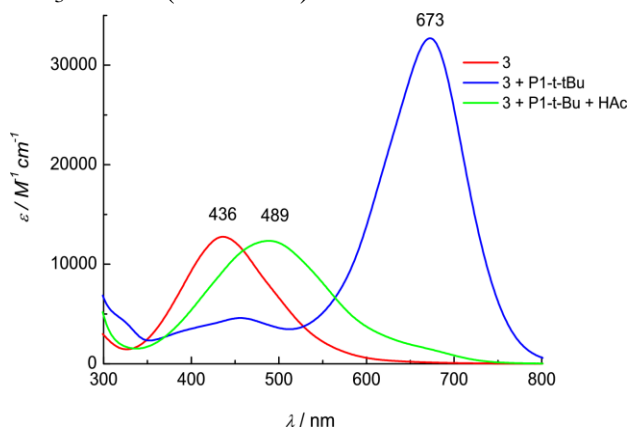



**Fig. S9.** Emission spectrum of **4** in a THF matrix at 77 K ( $10^{-7}$  M,  $\lambda_{\text{exc}} = 388$  nm).

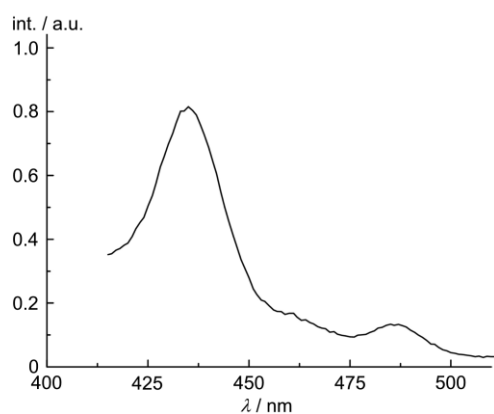

**Fig. S10.** Experimental (black) and simulated (red) EPR spectra of complex **6**<sup>•+</sup> ( $10^{-3}$  M) in a mixture of THF/CH<sub>3</sub>CN (v/v, 9/1) at room temperature, freq = 9.413686 GHz,  $g = 1.9965$ ,  $A_{\text{iso}}(^{195}\text{Pt}) = 23$  G,  $A_{\text{iso}}(2\times^1\text{H}) = 3.3$  G. (\* = unknown species / impurity).

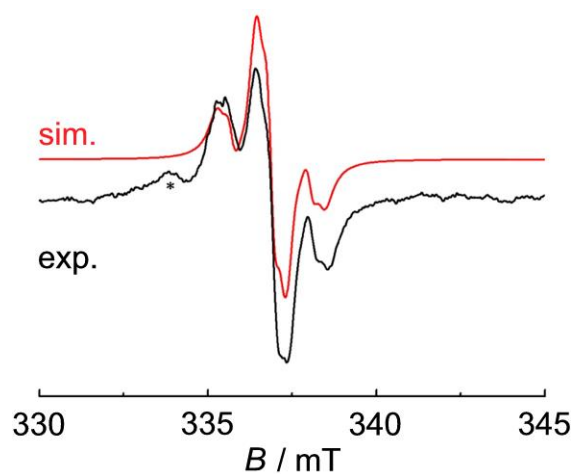

**Fig. S11.** UV/Vis absorption spectra of **1**, after reaction with  $P_1$ -*t*-Bu and upon reacidification with HCl in dioxan and after addition of a mixture of  $P_1$ -*t*-Bu/HCl to **1**.

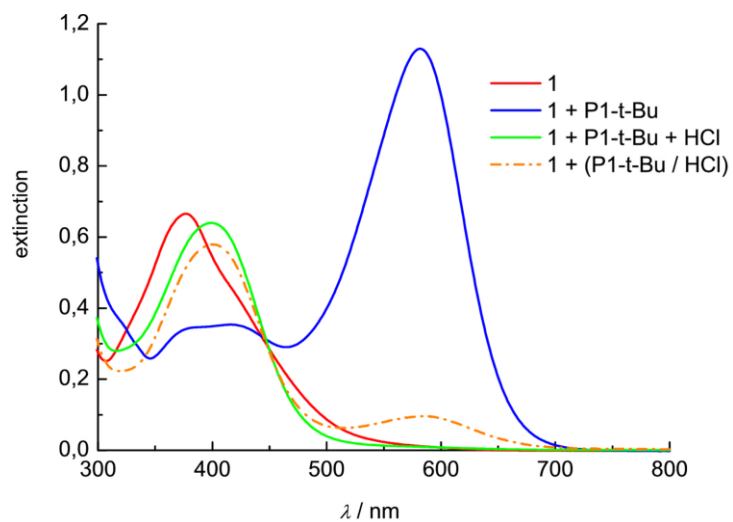

**Fig. S12.** FD mass spectrum of **1** after reaction with  $P_1$ -*t*-Bu and HCl.

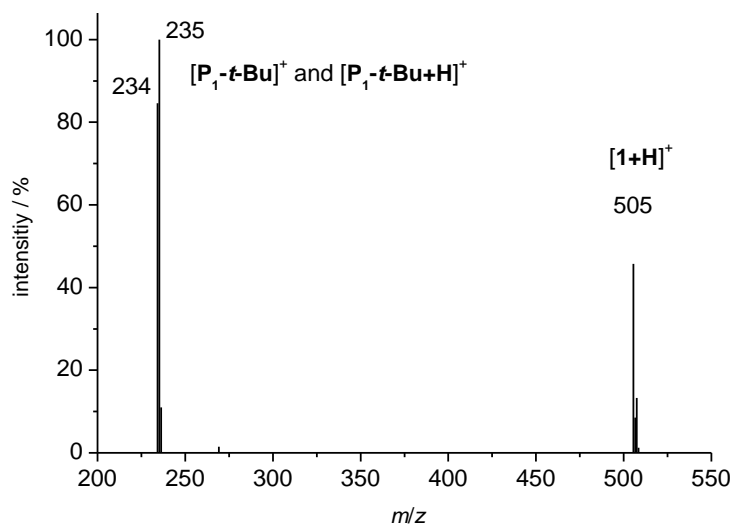

**Fig. S11.** Graphical representation of relevant molecular orbitals of **1**, **1<sup>-</sup>**, **2**, **3**, **3<sup>-</sup>**, **4**, **6**, **6<sup>-</sup>** and **7**

(contour value 0.02 a.u.)

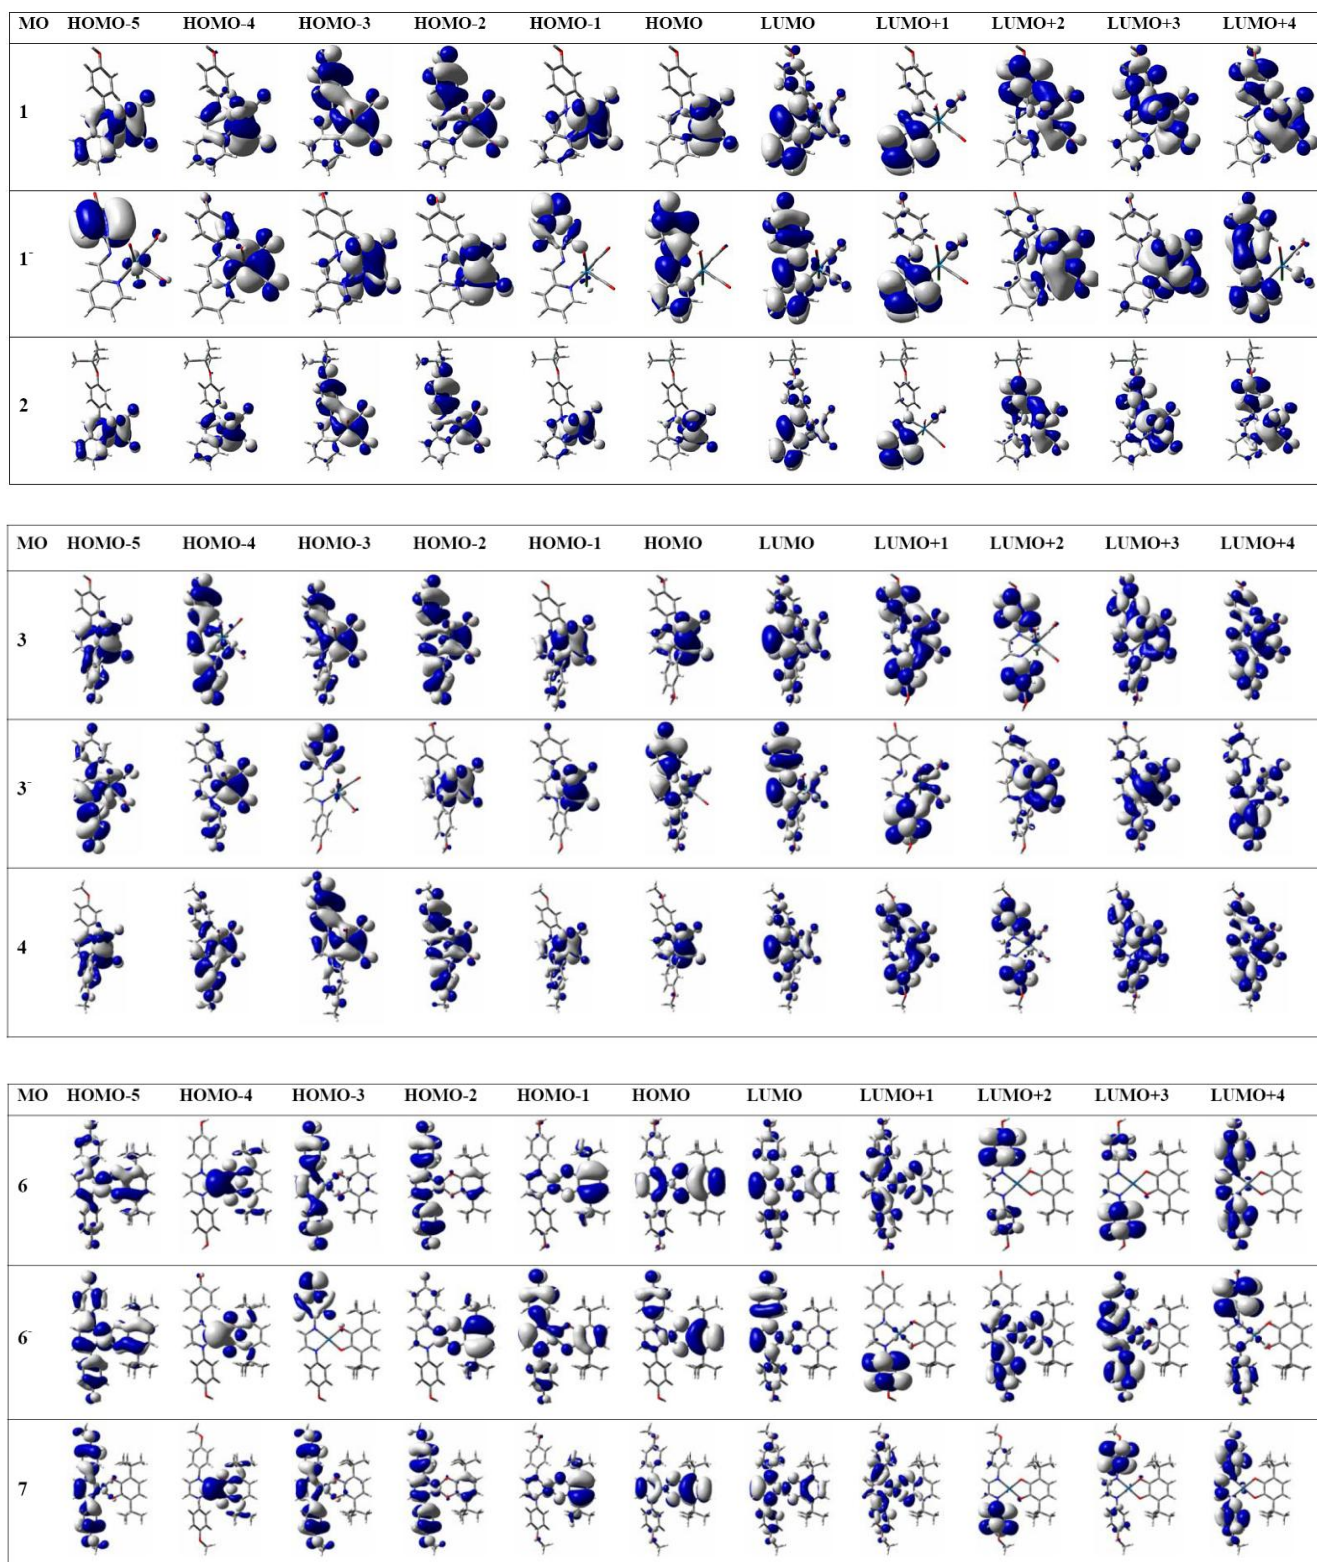

### Optimised Cartesian Coordinates of **1**

|    |              |              |              |
|----|--------------|--------------|--------------|
| 6  | -0.047082000 | -0.107119000 | 0.186525000  |
| 6  | 0.163281000  | 0.730802000  | 1.287449000  |
| 6  | 1.404452000  | 0.747518000  | 1.920844000  |
| 6  | 2.446626000  | -0.057623000 | 1.447033000  |
| 6  | 2.237810000  | -0.886526000 | 0.333576000  |
| 6  | 0.995005000  | -0.920324000 | -0.282609000 |
| 1  | -0.635032000 | 1.379019000  | 1.642894000  |
| 1  | 1.576197000  | 1.420907000  | 2.755696000  |
| 1  | 3.044203000  | -1.526651000 | -0.008094000 |
| 1  | 0.812418000  | -1.568226000 | -1.133380000 |
| 7  | 3.723218000  | -0.053371000 | 2.083572000  |
| 6  | 7.357619000  | 0.035318000  | 3.784592000  |
| 6  | 7.566457000  | -0.169978000 | 5.147245000  |
| 7  | 6.135137000  | 0.030300000  | 3.231718000  |
| 6  | 3.773967000  | -0.218577000 | 3.365654000  |
| 6  | 5.061949000  | -0.197272000 | 4.035670000  |
| 1  | 2.870468000  | -0.398850000 | 3.947913000  |
| 75 | 5.673193000  | 0.236200000  | 1.078434000  |
| 17 | 5.766716000  | -2.281118000 | 1.091972000  |
| 6  | 5.543719000  | 2.151583000  | 1.167676000  |
| 6  | 5.073971000  | 0.244305000  | -0.758729000 |
| 6  | 7.504325000  | 0.335157000  | 0.484776000  |
| 8  | 4.703099000  | 0.232431000  | -1.856034000 |
| 8  | 5.461149000  | 3.311682000  | 1.231157000  |
| 8  | 8.624696000  | 0.375276000  | 0.185658000  |
| 6  | 5.196564000  | -0.409273000 | 5.410595000  |
| 6  | 6.467928000  | -0.395275000 | 5.976748000  |
| 1  | 4.312621000  | -0.588830000 | 6.014363000  |
| 1  | 6.599807000  | -0.560270000 | 7.041548000  |
| 1  | 8.577429000  | -0.155403000 | 5.539881000  |
| 1  | 8.186663000  | 0.205386000  | 3.107918000  |
| 8  | -1.236349000 | -0.173301000 | -0.474201000 |
| 1  | -1.866724000 | 0.441431000  | -0.066809000 |

## Optimised Cartesian Coordinates of **2**

|    |              |              |              |
|----|--------------|--------------|--------------|
| 6  | 0.157869000  | 0.096094000  | 0.713706000  |
| 6  | 0.445266000  | 0.769059000  | 1.910588000  |
| 6  | 1.724474000  | 0.702185000  | 2.459844000  |
| 6  | 2.735186000  | -0.020586000 | 1.815497000  |
| 6  | 2.454492000  | -0.686357000 | 0.612581000  |
| 6  | 1.174901000  | -0.637284000 | 0.078816000  |
| 1  | -0.321829000 | 1.348964000  | 2.412492000  |
| 1  | 1.949305000  | 1.252065000  | 3.369579000  |
| 1  | 3.234073000  | -1.269064000 | 0.133698000  |
| 1  | 0.937983000  | -1.161372000 | -0.841200000 |
| 7  | 4.048651000  | -0.095595000 | 2.365930000  |
| 6  | 7.783579000  | -0.207547000 | 3.835694000  |
| 6  | 8.075754000  | -0.587411000 | 5.144413000  |
| 7  | 6.529160000  | -0.145274000 | 3.363688000  |
| 6  | 4.179713000  | -0.422759000 | 3.610670000  |
| 6  | 5.507136000  | -0.481297000 | 4.195807000  |
| 1  | 3.313990000  | -0.679647000 | 4.220953000  |
| 75 | 5.934973000  | 0.336386000  | 1.288209000  |
| 17 | 6.033637000  | -2.160145000 | 0.969192000  |
| 6  | 5.804482000  | 2.221729000  | 1.635373000  |
| 6  | 5.226425000  | 0.576772000  | -0.493298000 |
| 6  | 7.725068000  | 0.534491000  | 0.602516000  |
| 8  | 4.792221000  | 0.704487000  | -1.559693000 |
| 8  | 5.721310000  | 3.362472000  | 1.856220000  |
| 8  | 8.824604000  | 0.629413000  | 0.243533000  |
| 6  | 5.726013000  | -0.869589000 | 5.520635000  |
| 6  | 7.029916000  | -0.923203000 | 6.004169000  |
| 1  | 4.880343000  | -1.130500000 | 6.149049000  |
| 1  | 7.226911000  | -1.224534000 | 7.028307000  |
| 1  | 9.109202000  | -0.619854000 | 5.472110000  |
| 1  | 8.570042000  | 0.051748000  | 3.136836000  |
| 8  | -1.061163000 | 0.101297000  | 0.122134000  |
| 14 | -2.459450000 | 1.045150000  | 0.325415000  |
| 6  | -3.259151000 | 0.678563000  | 1.994833000  |
| 1  | -3.451608000 | -0.394801000 | 2.108061000  |
| 1  | -2.644042000 | 0.996845000  | 2.843915000  |
| 1  | -4.222845000 | 1.197455000  | 2.075105000  |
| 6  | -2.024849000 | 2.871127000  | 0.154663000  |
| 1  | -1.322758000 | 3.212121000  | 0.923453000  |
| 1  | -1.569610000 | 3.073515000  | -0.821765000 |
| 1  | -2.928096000 | 3.489054000  | 0.234225000  |
| 6  | -3.571802000 | 0.474952000  | -1.075107000 |
| 1  | -4.531301000 | 1.006218000  | -1.059148000 |
| 1  | -3.103969000 | 0.656298000  | -2.049250000 |
| 1  | -3.781900000 | -0.598036000 | -1.000334000 |

|    |              |              |              |
|----|--------------|--------------|--------------|
| 75 | -0.041985000 | 0.006935000  | 0.186739000  |
| 8  | 0.198365000  | 0.185342000  | 3.259536000  |
| 8  | 3.033935000  | -0.161003000 | -0.104795000 |
| 8  | -0.228775000 | -3.078889000 | 0.292852000  |
| 17 | -0.260027000 | -0.076492000 | -2.321320000 |
| 8  | 3.824405000  | 5.956663000  | -0.285017000 |
| 8  | -6.154535000 | -3.571092000 | 0.411183000  |
| 7  | -2.212956000 | 0.367086000  | 0.139248000  |
| 7  | -0.276723000 | 2.178297000  | -0.080121000 |
| 6  | -2.552516000 | 1.596944000  | -0.129549000 |
| 1  | -3.595125000 | 1.884050000  | -0.254333000 |
| 6  | -1.509207000 | 2.578518000  | -0.220566000 |
| 1  | -1.746853000 | 3.624469000  | -0.406874000 |
| 6  | -3.224006000 | -0.628428000 | 0.178889000  |
| 6  | -4.221889000 | -0.683588000 | -0.804900000 |
| 1  | -4.189056000 | 0.004538000  | -1.643494000 |
| 6  | -5.208095000 | -1.664028000 | -0.750126000 |
| 1  | -5.960633000 | -1.717790000 | -1.534007000 |
| 6  | -5.215728000 | -2.592705000 | 0.297720000  |
| 6  | -4.217489000 | -2.542975000 | 1.281844000  |
| 1  | -4.234651000 | -3.272903000 | 2.084157000  |
| 6  | -3.221734000 | -1.580380000 | 1.211931000  |
| 1  | -2.449297000 | -1.540778000 | 1.972124000  |
| 6  | 1.883606000  | -0.103727000 | 0.012357000  |
| 6  | -0.140731000 | -1.925292000 | 0.263730000  |
| 6  | 2.797317000  | 5.067265000  | -0.199109000 |
| 6  | 1.694271000  | 5.260602000  | 0.641041000  |
| 1  | 1.636737000  | 6.143319000  | 1.274583000  |
| 6  | 0.674751000  | 4.312550000  | 0.678610000  |
| 1  | -0.164894000 | 4.449156000  | 1.353897000  |
| 6  | 0.757861000  | 3.154411000  | -0.105772000 |
| 6  | 1.872587000  | 2.958755000  | -0.937617000 |
| 1  | 1.914300000  | 2.078312000  | -1.568795000 |
| 6  | 2.876708000  | 3.914235000  | -0.993794000 |
| 1  | 3.733674000  | 3.784613000  | -1.646276000 |
| 6  | 0.111210000  | 0.119431000  | 2.100212000  |
| 1  | -6.768002000 | -3.519763000 | -0.338846000 |
| 1  | 3.659595000  | 6.700147000  | 0.316154000  |

|    |              |              |              |
|----|--------------|--------------|--------------|
| 75 | -0.092886000 | 0.019191000  | 0.220283000  |
| 8  | 0.234878000  | 0.140003000  | 3.287569000  |
| 8  | 2.970706000  | -0.185389000 | -0.161629000 |
| 8  | -0.316805000 | -3.065483000 | 0.276044000  |
| 17 | -0.381647000 | -0.016793000 | -2.282296000 |
| 8  | 3.857844000  | 5.904029000  | -0.243153000 |
| 8  | -6.217548000 | -3.508084000 | 0.569040000  |
| 7  | -2.260208000 | 0.408368000  | 0.237631000  |
| 7  | -0.306082000 | 2.198296000  | 0.001455000  |
| 6  | -2.590151000 | 1.647231000  | 0.000530000  |
| 1  | -3.631848000 | 1.949589000  | -0.091555000 |
| 6  | -1.536380000 | 2.616870000  | -0.099048000 |
| 1  | -1.764329000 | 3.669516000  | -0.257658000 |
| 6  | -3.281858000 | -0.575416000 | 0.285155000  |
| 6  | -4.302785000 | -0.605124000 | -0.672752000 |
| 1  | -4.281414000 | 0.096989000  | -1.500306000 |
| 6  | -5.302261000 | -1.576167000 | -0.617944000 |
| 1  | -6.062274000 | -1.595359000 | -1.390088000 |
| 6  | -5.295247000 | -2.523776000 | 0.414555000  |
| 6  | -4.268491000 | -2.496302000 | 1.375482000  |
| 1  | -4.277410000 | -3.241191000 | 2.164242000  |
| 6  | -3.264772000 | -1.546145000 | 1.302254000  |
| 1  | -2.474733000 | -1.528476000 | 2.044970000  |
| 6  | 1.824999000  | -0.114030000 | -0.010479000 |
| 6  | -0.215162000 | -1.912578000 | 0.265347000  |
| 6  | 3.883998000  | 7.071528000  | 0.565461000  |
| 1  | 3.024632000  | 7.722682000  | 0.359128000  |
| 1  | 4.804861000  | 7.594744000  | 0.303344000  |
| 1  | 3.900728000  | 6.819507000  | 1.633652000  |
| 6  | 2.804748000  | 5.054303000  | -0.123272000 |
| 6  | 1.723170000  | 5.242238000  | 0.747514000  |
| 1  | 1.676753000  | 6.100775000  | 1.407083000  |
| 6  | 0.693304000  | 4.301240000  | 0.781735000  |
| 1  | -0.128583000 | 4.432204000  | 1.479931000  |
| 6  | 0.740135000  | 3.161430000  | -0.028404000 |
| 6  | 1.833896000  | 2.969622000  | -0.890582000 |
| 1  | 1.851125000  | 2.103530000  | -1.542434000 |
| 6  | 2.845254000  | 3.913852000  | -0.945356000 |
| 1  | 3.686594000  | 3.791104000  | -1.619366000 |
| 6  | -7.265011000 | -3.614509000 | -0.385302000 |
| 1  | -7.886645000 | -2.709942000 | -0.401697000 |
| 1  | -7.871431000 | -4.464081000 | -0.067699000 |
| 1  | -6.871617000 | -3.804294000 | -1.392029000 |
| 6  | 0.114447000  | 0.095840000  | 2.130063000  |

### Optimised Cartesian Coordinates of **6**

|    |              |              |              |
|----|--------------|--------------|--------------|
| 6  | -0.060394000 | -0.269304000 | 0.438020000  |
| 6  | 0.293656000  | -1.191810000 | 1.429869000  |
| 6  | 1.526473000  | -1.088599000 | 2.068056000  |
| 6  | 2.422188000  | -0.065137000 | 1.723464000  |
| 6  | 2.065047000  | 0.847292000  | 0.717876000  |
| 6  | 0.833666000  | 0.750170000  | 0.085112000  |
| 1  | -0.386020000 | -2.000006000 | 1.692798000  |
| 1  | 1.811404000  | -1.827992000 | 2.810472000  |
| 1  | 2.761371000  | 1.631641000  | 0.449658000  |
| 1  | 0.548263000  | 1.455330000  | -0.688298000 |
| 7  | 3.665014000  | 0.067255000  | 2.391240000  |
| 6  | 7.311838000  | 0.396614000  | 3.982080000  |
| 6  | 7.544066000  | 1.150884000  | 5.146236000  |
| 6  | 8.394082000  | -0.222395000 | 3.342912000  |
| 6  | 8.825919000  | 1.274901000  | 5.665765000  |
| 1  | 6.719579000  | 1.673846000  | 5.621642000  |
| 6  | 9.677629000  | -0.104125000 | 3.864856000  |
| 1  | 8.216193000  | -0.797235000 | 2.443105000  |
| 6  | 9.901240000  | 0.642999000  | 5.027781000  |
| 1  | 9.016153000  | 1.870240000  | 6.552787000  |
| 1  | 10.508860000 | -0.593836000 | 3.361925000  |
| 7  | 6.002765000  | 0.241553000  | 3.463879000  |
| 6  | 3.716670000  | -0.075833000 | 3.714474000  |
| 6  | 4.987806000  | 0.024274000  | 4.298889000  |
| 78 | 5.461584000  | 0.391482000  | 1.519125000  |
| 8  | 4.899640000  | 0.536200000  | -0.389959000 |
| 8  | 7.246300000  | 0.711415000  | 0.681248000  |
| 6  | 5.913445000  | 0.753350000  | -1.243275000 |
| 6  | 5.720879000  | 0.861332000  | -2.645979000 |
| 6  | 7.203396000  | 0.858866000  | -0.652784000 |
| 6  | 6.875475000  | 1.101510000  | -3.387601000 |
| 6  | 8.363077000  | 1.116686000  | -1.430305000 |
| 6  | 8.146479000  | 1.230889000  | -2.801764000 |
| 1  | 6.810341000  | 1.196379000  | -4.465403000 |
| 1  | 8.983022000  | 1.428770000  | -3.462116000 |
| 6  | 4.331350000  | 0.734986000  | -3.292701000 |
| 6  | 4.401645000  | 0.799652000  | -4.831481000 |
| 1  | 4.800809000  | 1.756491000  | -5.187224000 |
| 1  | 5.019641000  | -0.005158000 | -5.246268000 |
| 1  | 3.392557000  | 0.689829000  | -5.245774000 |
| 6  | 3.437107000  | 1.903002000  | -2.812531000 |
| 1  | 2.427968000  | 1.812431000  | -3.235401000 |
| 1  | 3.357485000  | 1.911238000  | -1.724006000 |
| 1  | 3.853440000  | 2.865619000  | -3.132674000 |
| 6  | 3.684535000  | -0.618584000 | -2.910422000 |



|   |              |              |              |
|---|--------------|--------------|--------------|
| 1 | 3.578344000  | -0.718055000 | -1.828763000 |
| 1 | 2.690633000  | -0.704543000 | -3.368247000 |
| 1 | 4.296164000  | -1.452976000 | -3.274677000 |
| 6 | 9.759065000  | 1.249143000  | -0.798747000 |
| 6 | 10.833076000 | 1.616100000  | -1.842102000 |
| 1 | 10.615181000 | 2.571051000  | -2.333989000 |
| 1 | 11.804599000 | 1.714286000  | -1.343379000 |
| 1 | 10.937360000 | 0.847318000  | -2.616400000 |
| 6 | 9.755980000  | 2.360267000  | 0.279011000  |
| 1 | 9.500069000  | 3.328294000  | -0.168327000 |
| 1 | 9.034891000  | 2.147525000  | 1.070305000  |
| 1 | 10.753023000 | 2.451819000  | 0.729650000  |
| 6 | 10.164379000 | -0.102175000 | -0.163173000 |
| 1 | 9.434042000  | -0.416293000 | 0.584718000  |
| 1 | 10.230218000 | -0.885808000 | -0.927310000 |
| 1 | 11.146813000 | -0.017773000 | 0.320608000  |
| 8 | -1.252988000 | -0.314900000 | -0.221513000 |
| 8 | 11.137626000 | 0.796824000  | 5.581373000  |
| 1 | 5.158904000  | -0.089507000 | 5.364190000  |
| 1 | 2.811890000  | -0.236009000 | 4.291502000  |
| 1 | -1.771089000 | -1.067571000 | 0.104259000  |
| 1 | 11.792829000 | 0.342113000  | 5.028859000  |

### Optimised Cartesian Coordinates of 7

|   |              |              |              |
|---|--------------|--------------|--------------|
| 6 | -0.121375000 | 0.231515000  | 0.442779000  |
| 6 | 0.149576000  | -0.703991000 | 1.450240000  |
| 6 | 1.383751000  | -0.681724000 | 2.099812000  |
| 6 | 2.359627000  | 0.262761000  | 1.756218000  |
| 6 | 2.085859000  | 1.188144000  | 0.734607000  |
| 6 | 0.858757000  | 1.175013000  | 0.092027000  |
| 1 | -0.578417000 | -1.458418000 | 1.724861000  |
| 1 | 1.603299000  | -1.431646000 | 2.854068000  |
| 1 | 2.843910000  | 1.912214000  | 0.463824000  |
| 1 | 0.634184000  | 1.888622000  | -0.693765000 |
| 7 | 3.602486000  | 0.305783000  | 2.435124000  |
| 6 | 7.251699000  | 0.360783000  | 4.053215000  |
| 6 | 7.536928000  | 1.099573000  | 5.217313000  |
| 6 | 8.284861000  | -0.342887000 | 3.425381000  |
| 6 | 8.821005000  | 1.121835000  | 5.738547000  |
| 1 | 6.755127000  | 1.688819000  | 5.687306000  |
| 6 | 9.576183000  | -0.328101000 | 3.948723000  |
| 1 | 8.066078000  | -0.906015000 | 2.526978000  |
| 6 | 9.853270000  | 0.404770000  | 5.110726000  |
| 1 | 9.056648000  | 1.703443000  | 6.623962000  |
| 1 | 10.352823000 | -0.887166000 | 3.440651000  |
| 7 | 5.938044000  | 0.307386000  | 3.527044000  |

|    |              |              |              |
|----|--------------|--------------|--------------|
| 6  | 3.631928000  | 0.173592000  | 3.759867000  |
| 6  | 4.902454000  | 0.179463000  | 4.354850000  |
| 78 | 5.426035000  | 0.481950000  | 1.576043000  |
| 8  | 4.892897000  | 0.652301000  | -0.339897000 |
| 8  | 7.236765000  | 0.660623000  | 0.752098000  |
| 6  | 5.927948000  | 0.784144000  | -1.185381000 |
| 6  | 5.757102000  | 0.891677000  | -2.590819000 |
| 6  | 7.216777000  | 0.798822000  | -0.583573000 |
| 6  | 6.933087000  | 1.038919000  | -3.323475000 |
| 6  | 8.399387000  | 0.962931000  | -1.351935000 |
| 6  | 8.204680000  | 1.079749000  | -2.726592000 |
| 1  | 6.884781000  | 1.127447000  | -4.402681000 |
| 1  | 9.059545000  | 1.208012000  | -3.380695000 |
| 6  | 4.368207000  | 0.860359000  | -3.250939000 |
| 6  | 4.458587000  | 0.900718000  | -4.789348000 |
| 1  | 4.930548000  | 1.821314000  | -5.151513000 |
| 1  | 5.020239000  | 0.047771000  | -5.187754000 |
| 1  | 3.448466000  | 0.860186000  | -5.213681000 |
| 6  | 3.557237000  | 2.096376000  | -2.793913000 |
| 1  | 2.548567000  | 2.074696000  | -3.227166000 |
| 1  | 3.466651000  | 2.122968000  | -1.706579000 |
| 1  | 4.046162000  | 3.022165000  | -3.120000000 |
| 6  | 3.618991000  | -0.436789000 | -2.860025000 |
| 1  | 3.492511000  | -0.512880000 | -1.778677000 |
| 1  | 2.627238000  | -0.455139000 | -3.330045000 |
| 1  | 4.171605000  | -1.319000000 | -3.205479000 |
| 6  | 9.795654000  | 0.995340000  | -0.707564000 |
| 6  | 10.903414000 | 1.275426000  | -1.742288000 |
| 1  | 10.761481000 | 2.241172000  | -2.240846000 |
| 1  | 11.875055000 | 1.303605000  | -1.234977000 |
| 1  | 10.956456000 | 0.496487000  | -2.511516000 |
| 6  | 9.864410000  | 2.109847000  | 0.364709000  |
| 1  | 9.681652000  | 3.091374000  | -0.089138000 |
| 1  | 9.124139000  | 1.952766000  | 1.151099000  |
| 1  | 10.862057000 | 2.132521000  | 0.822766000  |
| 6  | 10.091824000 | -0.378737000 | -0.060778000 |
| 1  | 9.330452000  | -0.633145000 | 0.678833000  |
| 1  | 10.108915000 | -1.168986000 | -0.820775000 |
| 1  | 11.071443000 | -0.365439000 | 0.435835000  |
| 8  | -1.288058000 | 0.304490000  | -0.253992000 |
| 8  | 11.076277000 | 0.491346000  | 5.700329000  |
| 1  | -1.989412000 | -1.659810000 | -0.143884000 |
| 6  | -2.314713000 | -0.628448000 | 0.045395000  |
| 1  | -2.648443000 | -0.539865000 | 1.087749000  |
| 1  | -3.143910000 | -0.384196000 | -0.620711000 |
| 1  | 12.011464000 | -1.259974000 | 5.049622000  |
| 6  | 12.170161000 | -0.174333000 | 5.085654000  |

|   |              |             |             |
|---|--------------|-------------|-------------|
| 1 | 13.039488000 | 0.042895000 | 5.708547000 |
| 1 | 12.347403000 | 0.199547000 | 4.069103000 |
| 1 | 5.055007000  | 0.063052000 | 5.422738000 |
| 1 | 2.712476000  | 0.090772000 | 4.329951000 |

### Optimised Cartesian Coordinates of $1^-$

|    |              |              |              |
|----|--------------|--------------|--------------|
| 6  | 0.211465000  | -0.190380000 | -0.045610000 |
| 6  | 1.555716000  | 0.049549000  | 0.479698000  |
| 6  | 2.141262000  | 1.283761000  | 0.460015000  |
| 6  | 1.456884000  | 2.435895000  | -0.051599000 |
| 6  | 0.125523000  | 2.239834000  | -0.531550000 |
| 6  | -0.459437000 | 1.003555000  | -0.548347000 |
| 1  | 2.064813000  | -0.803869000 | 0.921572000  |
| 1  | 3.121183000  | 1.412381000  | 0.913962000  |
| 1  | -0.391822000 | 3.088120000  | -0.962298000 |
| 1  | -1.458828000 | 0.869113000  | -0.953859000 |
| 7  | 2.049965000  | 3.673976000  | -0.120894000 |
| 6  | 3.777907000  | 7.370101000  | -0.026668000 |
| 6  | 5.147094000  | 7.574708000  | -0.129263000 |
| 7  | 3.212705000  | 6.151674000  | -0.014768000 |
| 6  | 3.374013000  | 3.777707000  | -0.153053000 |
| 6  | 4.012449000  | 5.046459000  | -0.132078000 |
| 1  | 3.994795000  | 2.891953000  | -0.255828000 |
| 75 | 1.054478000  | 5.721376000  | 0.070350000  |
| 17 | 1.199756000  | 5.858774000  | -2.451695000 |
| 6  | 1.055193000  | 5.532730000  | 1.976087000  |
| 6  | -0.821519000 | 5.271494000  | -0.022375000 |
| 6  | 0.552652000  | 7.560488000  | 0.197017000  |
| 8  | -1.960434000 | 5.047837000  | -0.085918000 |
| 8  | 1.060266000  | 5.421454000  | 3.138895000  |
| 8  | 0.300816000  | 8.697945000  | 0.268581000  |
| 6  | 5.416901000  | 5.189959000  | -0.238248000 |
| 6  | 5.982211000  | 6.449958000  | -0.235341000 |
| 1  | 6.029253000  | 4.297619000  | -0.327800000 |
| 1  | 7.059820000  | 6.568022000  | -0.317914000 |
| 1  | 5.545060000  | 8.583711000  | -0.128305000 |
| 1  | 3.093059000  | 8.207074000  | 0.051118000  |
| 8  | -0.315489000 | -1.322180000 | -0.042148000 |

### Optimised Cartesian Coordinates of $3^-$

|    |              |              |              |
|----|--------------|--------------|--------------|
| 75 | -0.004054000 | -0.069618000 | 0.024186000  |
| 8  | 0.531150000  | 0.152071000  | 3.051243000  |
| 8  | 2.990511000  | -0.525224000 | -0.595351000 |
| 8  | -0.272197000 | -3.130943000 | 0.205339000  |
| 17 | -0.515668000 | -0.108469000 | -2.460520000 |

|   |              |              |              |
|---|--------------|--------------|--------------|
| 8 | 3.686046000  | 6.119022000  | -0.211190000 |
| 8 | -6.236575000 | -3.534679000 | 0.438616000  |
| 7 | -2.168310000 | 0.306123000  | 0.200591000  |
| 7 | -0.216508000 | 2.216956000  | -0.132623000 |
| 6 | -2.494629000 | 1.569764000  | 0.013021000  |
| 1 | -3.546765000 | 1.858177000  | -0.018834000 |
| 6 | -1.512574000 | 2.560872000  | -0.115829000 |
| 1 | -1.817137000 | 3.596040000  | -0.232847000 |
| 6 | -3.197715000 | -0.661065000 | 0.229242000  |
| 6 | -4.218481000 | -0.670995000 | -0.733390000 |
| 1 | -4.179047000 | 0.039998000  | -1.552320000 |
| 6 | -5.240471000 | -1.618632000 | -0.678556000 |
| 1 | -6.016498000 | -1.622202000 | -1.443325000 |
| 6 | -5.254119000 | -2.578002000 | 0.336535000  |
| 6 | -4.233215000 | -2.588247000 | 1.293201000  |
| 1 | -4.249804000 | -3.343562000 | 2.072865000  |
| 6 | -3.215011000 | -1.643574000 | 1.234084000  |
| 1 | -2.424631000 | -1.647572000 | 1.977422000  |
| 6 | 1.869989000  | -0.322608000 | -0.354790000 |
| 6 | -0.161235000 | -1.973787000 | 0.138714000  |
| 6 | 2.810701000  | 5.232570000  | -0.180991000 |
| 6 | 1.456671000  | 5.487589000  | 0.317022000  |
| 1 | 1.262108000  | 6.484339000  | 0.705618000  |
| 6 | 0.491000000  | 4.525665000  | 0.335177000  |
| 1 | -0.477708000 | 4.759508000  | 0.768250000  |
| 6 | 0.749178000  | 3.181096000  | -0.111529000 |
| 6 | 2.079508000  | 2.896546000  | -0.561604000 |
| 1 | 2.290354000  | 1.903041000  | -0.932718000 |
| 6 | 3.046982000  | 3.858491000  | -0.613253000 |
| 1 | 4.038556000  | 3.628631000  | -0.993833000 |
| 6 | 0.331663000  | 0.070857000  | 1.902410000  |
| 1 | -6.840748000 | -3.429073000 | -0.312273000 |

### Optimised Cartesian Coordinates of $\mathbf{6}^-$

|   |              |              |              |
|---|--------------|--------------|--------------|
| 6 | -5.797789000 | -2.014256000 | -0.103789000 |
| 6 | -5.072822000 | -3.232480000 | -0.472258000 |
| 6 | -3.711356000 | -3.308462000 | -0.450266000 |
| 6 | -2.899333000 | -2.181468000 | -0.073986000 |
| 6 | -3.579074000 | -0.959785000 | 0.232059000  |
| 6 | -4.942651000 | -0.880959000 | 0.233784000  |
| 1 | -5.675274000 | -4.078538000 | -0.794264000 |
| 1 | -3.233253000 | -4.224877000 | -0.784126000 |
| 1 | -2.974028000 | -0.097701000 | 0.481278000  |
| 1 | -5.441975000 | 0.048352000  | 0.494846000  |
| 7 | -1.536898000 | -2.261718000 | 0.021867000  |
| 6 | 2.528741000  | -2.331244000 | 0.053852000  |

|    |              |              |              |
|----|--------------|--------------|--------------|
| 6  | 3.239521000  | -3.158191000 | 0.942119000  |
| 6  | 3.254064000  | -1.510307000 | -0.820648000 |
| 6  | 4.631834000  | -3.183471000 | 0.942331000  |
| 1  | 2.692732000  | -3.764404000 | 1.658600000  |
| 6  | 4.645702000  | -1.529060000 | -0.818930000 |
| 1  | 2.709913000  | -0.857411000 | -1.490698000 |
| 6  | 5.341706000  | -2.366637000 | 0.058729000  |
| 1  | 5.180242000  | -3.813642000 | 1.636105000  |
| 1  | 5.191969000  | -0.881701000 | -1.503386000 |
| 7  | 1.117825000  | -2.335565000 | 0.014902000  |
| 6  | -0.924610000 | -3.469675000 | 0.085414000  |
| 6  | 0.462697000  | -3.491213000 | 0.086521000  |
| 78 | -0.126657000 | -0.712248000 | -0.013622000 |
| 8  | -1.286422000 | 0.947287000  | 0.036517000  |
| 8  | 1.313521000  | 0.685496000  | -0.089098000 |
| 6  | -0.569518000 | 2.092140000  | 0.030365000  |
| 6  | -1.181634000 | 3.367548000  | 0.083757000  |
| 6  | 0.839023000  | 1.952057000  | -0.037935000 |
| 6  | -0.317600000 | 4.470353000  | 0.073425000  |
| 6  | 1.694999000  | 3.079012000  | -0.041884000 |
| 6  | 1.070104000  | 4.331948000  | 0.014247000  |
| 1  | -0.725976000 | 5.474589000  | 0.113152000  |
| 1  | 1.670893000  | 5.235371000  | 0.016780000  |
| 6  | -2.710334000 | 3.525627000  | 0.163321000  |
| 6  | -3.146652000 | 5.004735000  | 0.164808000  |
| 1  | -2.747813000 | 5.550789000  | 1.028170000  |
| 1  | -2.826409000 | 5.526057000  | -0.745338000 |
| 1  | -4.241426000 | 5.062186000  | 0.213668000  |
| 6  | -3.226135000 | 2.888249000  | 1.476267000  |
| 1  | -4.322817000 | 2.934507000  | 1.526366000  |
| 1  | -2.916828000 | 1.844577000  | 1.554663000  |
| 1  | -2.824427000 | 3.425798000  | 2.344548000  |
| 6  | -3.377779000 | 2.847417000  | -1.057578000 |
| 1  | -3.101793000 | 1.793953000  | -1.123455000 |
| 1  | -4.471683000 | 2.920664000  | -0.987840000 |
| 1  | -3.064485000 | 3.342397000  | -1.985686000 |
| 6  | 3.225058000  | 2.931857000  | -0.115904000 |
| 6  | 3.950318000  | 4.290253000  | -0.035875000 |
| 1  | 3.731644000  | 4.814310000  | 0.902033000  |
| 1  | 5.035107000  | 4.128155000  | -0.081793000 |
| 1  | 3.679417000  | 4.952480000  | -0.866808000 |
| 6  | 3.734338000  | 2.062347000  | 1.058479000  |
| 1  | 3.509427000  | 2.547939000  | 2.016385000  |
| 1  | 3.258074000  | 1.080685000  | 1.051540000  |
| 1  | 4.823764000  | 1.929205000  | 0.994866000  |
| 6  | 3.609141000  | 2.276726000  | -1.463845000 |
| 1  | 3.097247000  | 1.320655000  | -1.581912000 |

|   |              |              |              |
|---|--------------|--------------|--------------|
| 1 | 3.322186000  | 2.924570000  | -2.301487000 |
| 1 | 4.694470000  | 2.108132000  | -1.520818000 |
| 8 | -7.043318000 | -1.958441000 | -0.102844000 |
| 8 | 6.715105000  | -2.419372000 | 0.097092000  |
| 1 | 1.013831000  | -4.428623000 | 0.122755000  |
| 1 | -1.499546000 | -4.382887000 | 0.166632000  |
| 1 | 7.058772000  | -1.757409000 | -0.522502000 |

### Optimised Cartesian Coordinates of $\mathbf{6}^{+}$

|    |              |              |              |
|----|--------------|--------------|--------------|
| 6  | 0.000000000  | 0.000000000  | 0.000000000  |
| 6  | 1.405242000  | 0.000000000  | 0.000000000  |
| 6  | 2.097459000  | 1.202190000  | 0.000000000  |
| 6  | 1.397374000  | 2.422583000  | -0.014471000 |
| 6  | -0.008797000 | 2.417028000  | -0.041074000 |
| 6  | -0.700492000 | 1.218673000  | -0.018993000 |
| 1  | 1.952109000  | -0.939412000 | -0.017012000 |
| 1  | 3.182455000  | 1.194894000  | -0.038745000 |
| 1  | -0.545251000 | 3.357109000  | -0.049555000 |
| 1  | -1.784719000 | 1.198613000  | -0.016512000 |
| 7  | 2.093054000  | 3.651496000  | 0.035379000  |
| 6  | 3.922925000  | 7.221029000  | -0.154648000 |
| 6  | 4.383289000  | 7.866662000  | 1.011870000  |
| 6  | 4.074897000  | 7.849325000  | -1.400477000 |
| 6  | 4.994102000  | 9.105137000  | 0.930210000  |
| 1  | 4.216371000  | 7.415439000  | 1.985212000  |
| 6  | 4.707078000  | 9.081272000  | -1.485942000 |
| 1  | 3.722586000  | 7.353730000  | -2.295879000 |
| 6  | 5.170829000  | 9.718441000  | -0.323295000 |
| 1  | 5.329674000  | 9.626193000  | 1.820261000  |
| 1  | 4.841313000  | 9.551674000  | -2.456715000 |
| 7  | 3.347655000  | 5.932959000  | -0.084708000 |
| 6  | 3.150589000  | 3.785619000  | 0.803072000  |
| 6  | 3.834306000  | 5.033110000  | 0.739939000  |
| 78 | 1.682785000  | 5.305804000  | -1.090061000 |
| 8  | 0.000540000  | 4.697970000  | -2.053201000 |
| 8  | 1.296791000  | 6.936970000  | -2.239985000 |
| 6  | -0.491437000 | 5.567538000  | -2.899596000 |
| 6  | -1.652335000 | 5.298851000  | -3.695229000 |
| 6  | 0.226627000  | 6.837679000  | -2.988731000 |
| 6  | -2.035831000 | 6.345810000  | -4.507216000 |
| 6  | -0.224664000 | 7.900547000  | -3.835932000 |
| 6  | -1.354849000 | 7.600238000  | -4.567746000 |
| 1  | -2.904610000 | 6.235150000  | -5.144858000 |
| 1  | -1.769402000 | 8.344426000  | -5.237105000 |
| 6  | -2.407461000 | 3.962311000  | -3.630706000 |
| 6  | -3.552620000 | 3.910339000  | -4.661574000 |

|   |              |              |              |
|---|--------------|--------------|--------------|
| 1 | -4.311411000 | 4.679612000  | -4.478921000 |
| 1 | -3.185957000 | 4.020398000  | -5.688556000 |
| 1 | -4.052965000 | 2.938774000  | -4.594373000 |
| 6 | -3.028599000 | 3.795596000  | -2.222424000 |
| 1 | -3.552108000 | 2.834664000  | -2.155966000 |
| 1 | -2.266620000 | 3.825677000  | -1.440475000 |
| 1 | -3.756770000 | 4.589157000  | -2.019957000 |
| 6 | -1.443901000 | 2.788852000  | -3.935993000 |
| 1 | -0.628762000 | 2.729377000  | -3.212039000 |
| 1 | -1.996437000 | 1.842758000  | -3.908189000 |
| 1 | -1.010321000 | 2.892431000  | -4.937452000 |
| 6 | 0.499699000  | 9.252782000  | -3.923292000 |
| 6 | -0.254153000 | 10.239746000 | -4.836648000 |
| 1 | -1.267687000 | 10.443746000 | -4.473204000 |
| 1 | 0.284498000  | 11.192867000 | -4.857069000 |
| 1 | -0.320605000 | 9.882019000  | -5.870347000 |
| 6 | 0.601408000  | 9.894904000  | -2.517795000 |
| 1 | -0.395566000 | 10.064104000 | -2.094956000 |
| 1 | 1.168792000  | 9.272809000  | -1.822537000 |
| 1 | 1.099922000  | 10.868436000 | -2.592685000 |
| 6 | 1.912113000  | 9.040168000  | -4.520240000 |
| 1 | 2.505420000  | 8.350739000  | -3.915410000 |
| 1 | 1.850899000  | 8.635713000  | -5.536866000 |
| 1 | 2.442696000  | 9.998411000  | -4.572400000 |
| 8 | -0.737036000 | -1.129952000 | 0.003794000  |
| 8 | 5.780299000  | 10.921647000 | -0.333502000 |
| 1 | 4.724870000  | 5.233686000  | 1.327048000  |
| 1 | 3.468195000  | 2.986053000  | 1.464892000  |
| 1 | -0.163235000 | -1.913594000 | 0.021260000  |
| 1 | 5.846729000  | 11.263441000 | -1.240346000 |

### Optimised Cartesian Coordinates of $7^{•+}$

|   |              |              |              |
|---|--------------|--------------|--------------|
| 6 | 0.000000000  | 0.000000000  | 0.000000000  |
| 6 | 1.407125000  | 0.000000000  | 0.000000000  |
| 6 | 2.095901000  | 1.206652000  | 0.000000000  |
| 6 | 1.400271000  | 2.427706000  | -0.015273000 |
| 6 | -0.007224000 | 2.423862000  | -0.043428000 |
| 6 | -0.695600000 | 1.226447000  | -0.020868000 |
| 1 | 1.964747000  | -0.928450000 | -0.017439000 |
| 1 | 3.181098000  | 1.199596000  | -0.038774000 |
| 1 | -0.542961000 | 3.364409000  | -0.052813000 |
| 1 | -1.779924000 | 1.204764000  | -0.019002000 |
| 7 | 2.097828000  | 3.654600000  | 0.033044000  |
| 6 | 3.934495000  | 7.220760000  | -0.162464000 |
| 6 | 4.420771000  | 7.859878000  | 0.999340000  |
| 6 | 4.067407000  | 7.856255000  | -1.405122000 |

|    |              |              |              |
|----|--------------|--------------|--------------|
| 6  | 5.033562000  | 9.093725000  | 0.908063000  |
| 1  | 4.270145000  | 7.406880000  | 1.974530000  |
| 6  | 4.702866000  | 9.087854000  | -1.503828000 |
| 1  | 3.696991000  | 7.365294000  | -2.295811000 |
| 6  | 5.192674000  | 9.719681000  | -0.346670000 |
| 1  | 5.388170000  | 9.611660000  | 1.792688000  |
| 1  | 4.812895000  | 9.547137000  | -2.478507000 |
| 7  | 3.357192000  | 5.935223000  | -0.090209000 |
| 6  | 3.156530000  | 3.788628000  | 0.799885000  |
| 6  | 3.842535000  | 5.033704000  | 0.734539000  |
| 78 | 1.689529000  | 5.308042000  | -1.093826000 |
| 8  | 0.006591000  | 4.697531000  | -2.056856000 |
| 8  | 1.298065000  | 6.939302000  | -2.243979000 |
| 6  | -0.485830000 | 5.565264000  | -2.904478000 |
| 6  | -1.643985000 | 5.293202000  | -3.703280000 |
| 6  | 0.228743000  | 6.837103000  | -2.993033000 |
| 6  | -2.030467000 | 6.339547000  | -4.514714000 |
| 6  | -0.224778000 | 7.898791000  | -3.841014000 |
| 6  | -1.353578000 | 7.595981000  | -4.573898000 |
| 1  | -2.897761000 | 6.226028000  | -5.153814000 |
| 1  | -1.769170000 | 8.338551000  | -5.244457000 |
| 6  | -2.392725000 | 3.952526000  | -3.644497000 |
| 6  | -3.534229000 | 3.897848000  | -4.679022000 |
| 1  | -4.297265000 | 4.662912000  | -4.496369000 |
| 1  | -3.164803000 | 4.012946000  | -5.704474000 |
| 1  | -4.030077000 | 2.923634000  | -4.616301000 |
| 6  | -3.016889000 | 3.776852000  | -2.238786000 |
| 1  | -3.535548000 | 2.812844000  | -2.178241000 |
| 1  | -2.256934000 | 3.806531000  | -1.455011000 |
| 1  | -3.749689000 | 4.565753000  | -2.034782000 |
| 6  | -1.421958000 | 2.785177000  | -3.950149000 |
| 1  | -0.610211000 | 2.727373000  | -3.222369000 |
| 1  | -1.970020000 | 1.836253000  | -3.928130000 |
| 1  | -0.984497000 | 2.894460000  | -4.949349000 |
| 6  | 0.499649000  | 9.251038000  | -3.931405000 |
| 6  | -0.258436000 | 10.238371000 | -4.840682000 |
| 1  | -1.269675000 | 10.443156000 | -4.471343000 |
| 1  | 0.281032000  | 11.190959000 | -4.865168000 |
| 1  | -0.331042000 | 9.879308000  | -5.873409000 |
| 6  | 0.609763000  | 9.892469000  | -2.526118000 |
| 1  | -0.384534000 | 10.057705000 | -2.095333000 |
| 1  | 1.184788000  | 9.271351000  | -1.836540000 |
| 1  | 1.104115000  | 10.867950000 | -2.603735000 |
| 6  | 1.908511000  | 9.035818000  | -4.535606000 |
| 1  | 2.501506000  | 8.341736000  | -3.935776000 |
| 1  | 1.840748000  | 8.635213000  | -5.553370000 |
| 1  | 2.443217000  | 9.991874000  | -4.586955000 |



|   |              |              |              |
|---|--------------|--------------|--------------|
| 8 | -0.767286000 | -1.104089000 | 0.004982000  |
| 8 | 5.809028000  | 10.913854000 | -0.324990000 |
| 1 | 0.468852000  | -2.553647000 | -0.855700000 |
| 6 | -0.146237000 | -2.390656000 | 0.036831000  |
| 1 | 0.464888000  | -2.510807000 | 0.938717000  |
| 1 | -0.964894000 | -3.109945000 | 0.051779000  |
| 1 | 6.618496000  | 11.055997000 | -2.246458000 |
| 6 | 5.996685000  | 11.628015000 | -1.548309000 |
| 1 | 6.509039000  | 12.549658000 | -1.272976000 |
| 1 | 5.034266000  | 11.867303000 | -2.015095000 |
| 1 | 4.734397000  | 5.232193000  | 1.320258000  |
| 1 | 3.472208000  | 2.989377000  | 1.462946000  |
